# Supplementary material for: Human ITGAV variants are associated with immune dysregulation, brain abnormalities, and colitis
Source: PubMed Central journal article supplement (PMC11554753; doi:10.1084/jem.20240546), 2024-11-11

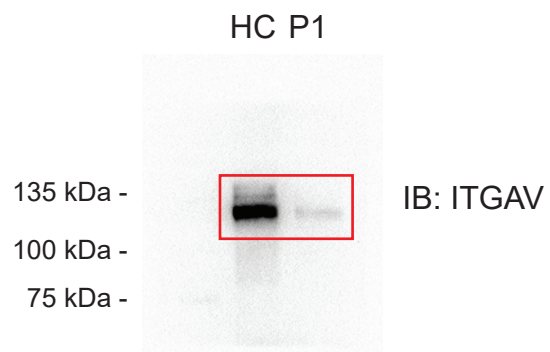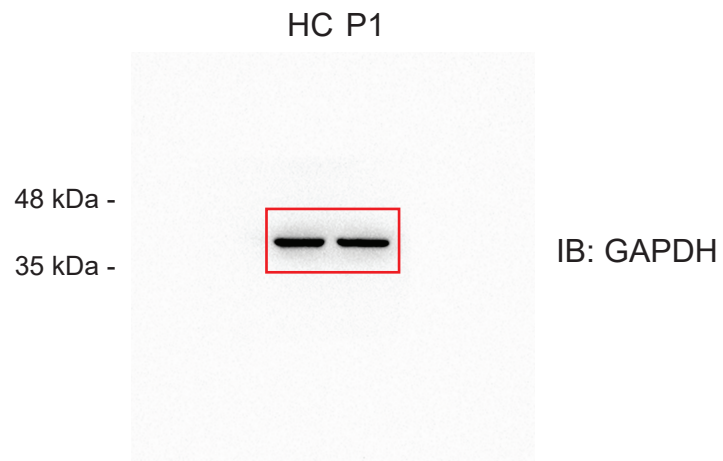

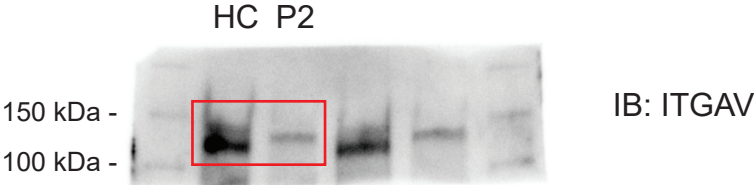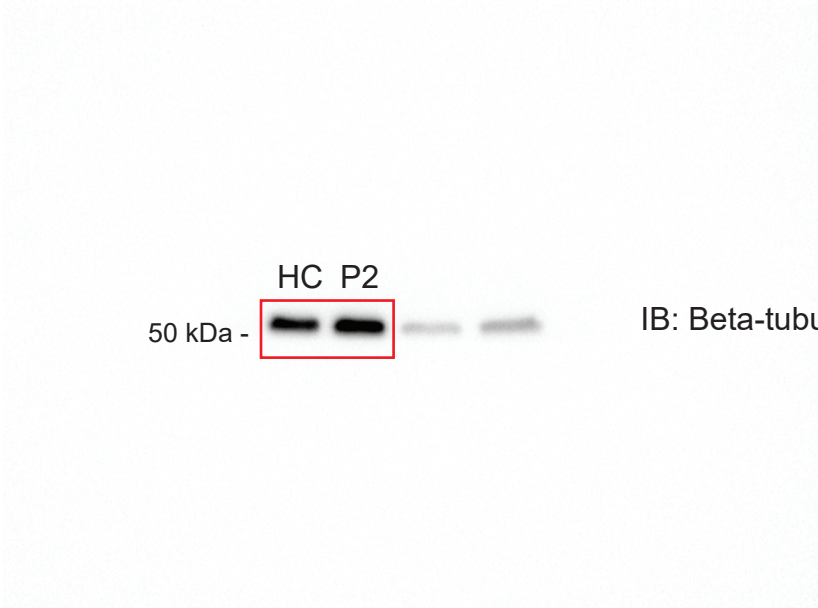

Supplement: JEM_20240546_SourceDataF2.pdf [file JEM_20240546_SourceDataF2.pdf]
